# Supplementary material
Source: publisher figshare collection journal article supplement (https://frontiersin.figshare.com/ndownloader/files/31070680)
Supplement: Supplementary file [file 31070680]

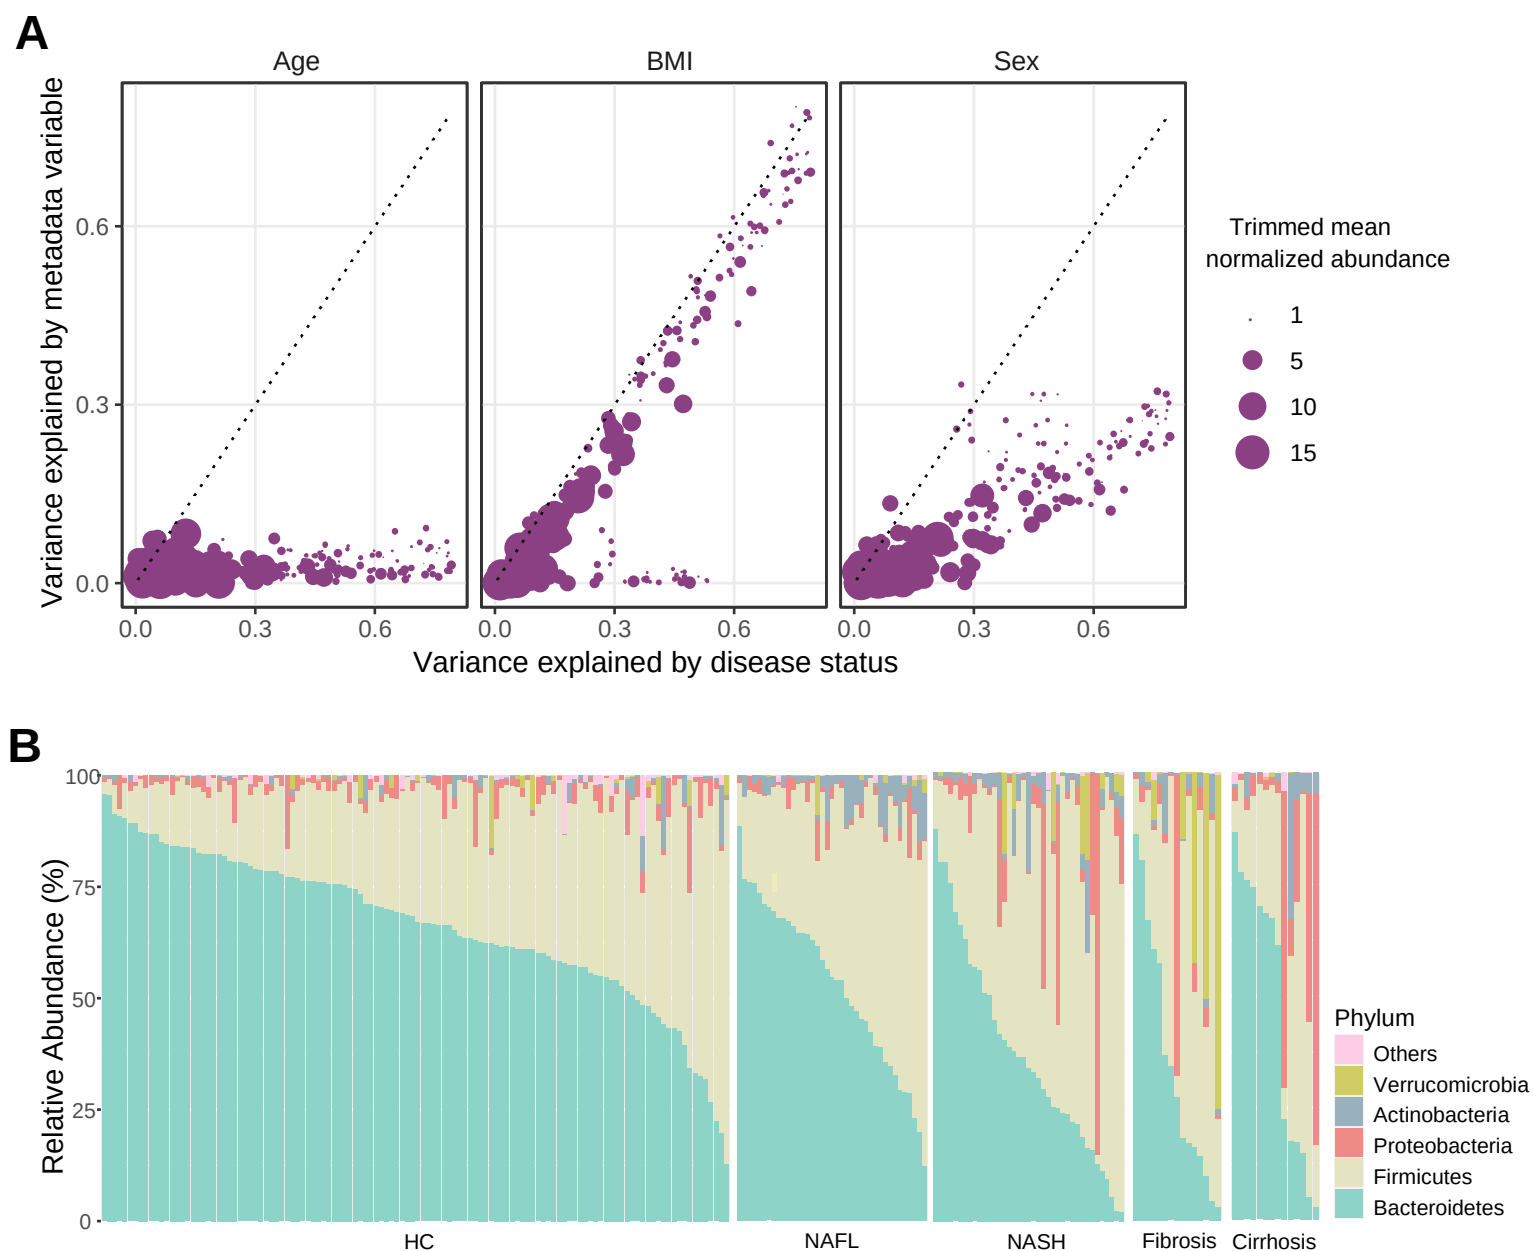

**Supplementary Figure 1: Confounder analysis and microbiome composition.** (A) Variance explained by disease status (case versus control) is plotted against variance explained by potential confounding factor (age, BMI and sex) for individual microbial species. Each genus is represented by a dot proportional in size to its normalized abundance. (B) Stacked bar plots depicting phylum-level differences in gut microbiome composition between the NAFLD stages and healthy controls. HC, healthy controls; NAFL, nonalcoholic fatty liver; NASH, nonalcoholic steatohepatitis.

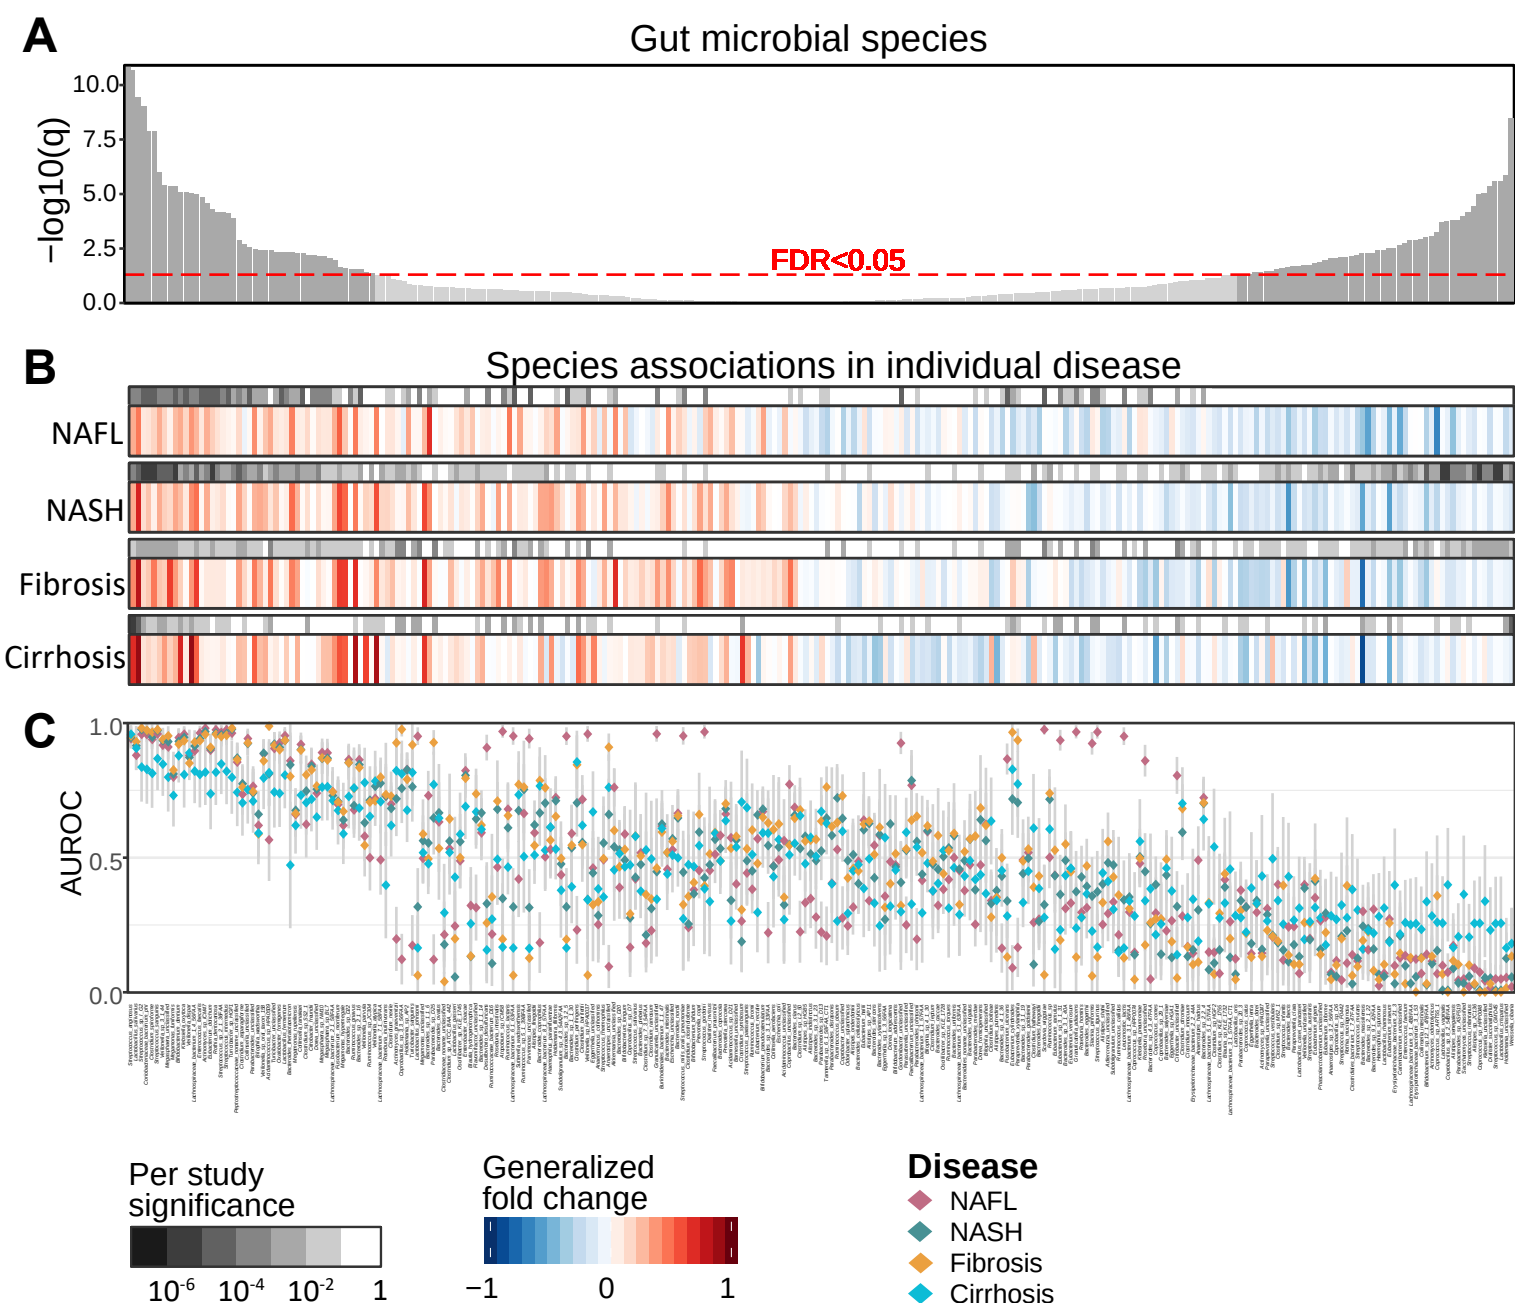

**Supplementary Figure 2: Consistent alteration patterns across stages of species detected in all studies.** (A) Meta-analysis significance of gut microbial species derived from blocked Wilcoxon tests is given by the bar height. Bars of a core of highly significant species (meta-analysis FDR = 0.05) were colored as dark gray. (B) Species-level significance, as calculated with a blocked two-sided Wilcoxon test (FDR P value), and the generalized fold change within individual stages are displayed as heatmaps in gray and in color, respectively. Species are ordered by meta-analysis significance and direction of change. (C) Association strength is quantified by the AUROC across individual stages (color-coded diamonds), and the 95% confidence intervals are indicated by the gray lines. Order-level taxonomic information is color-coded above the species names. HC, healthy controls; NAFL, nonalcoholic fatty liver; NASH, nonalcoholic steatohepatitis.

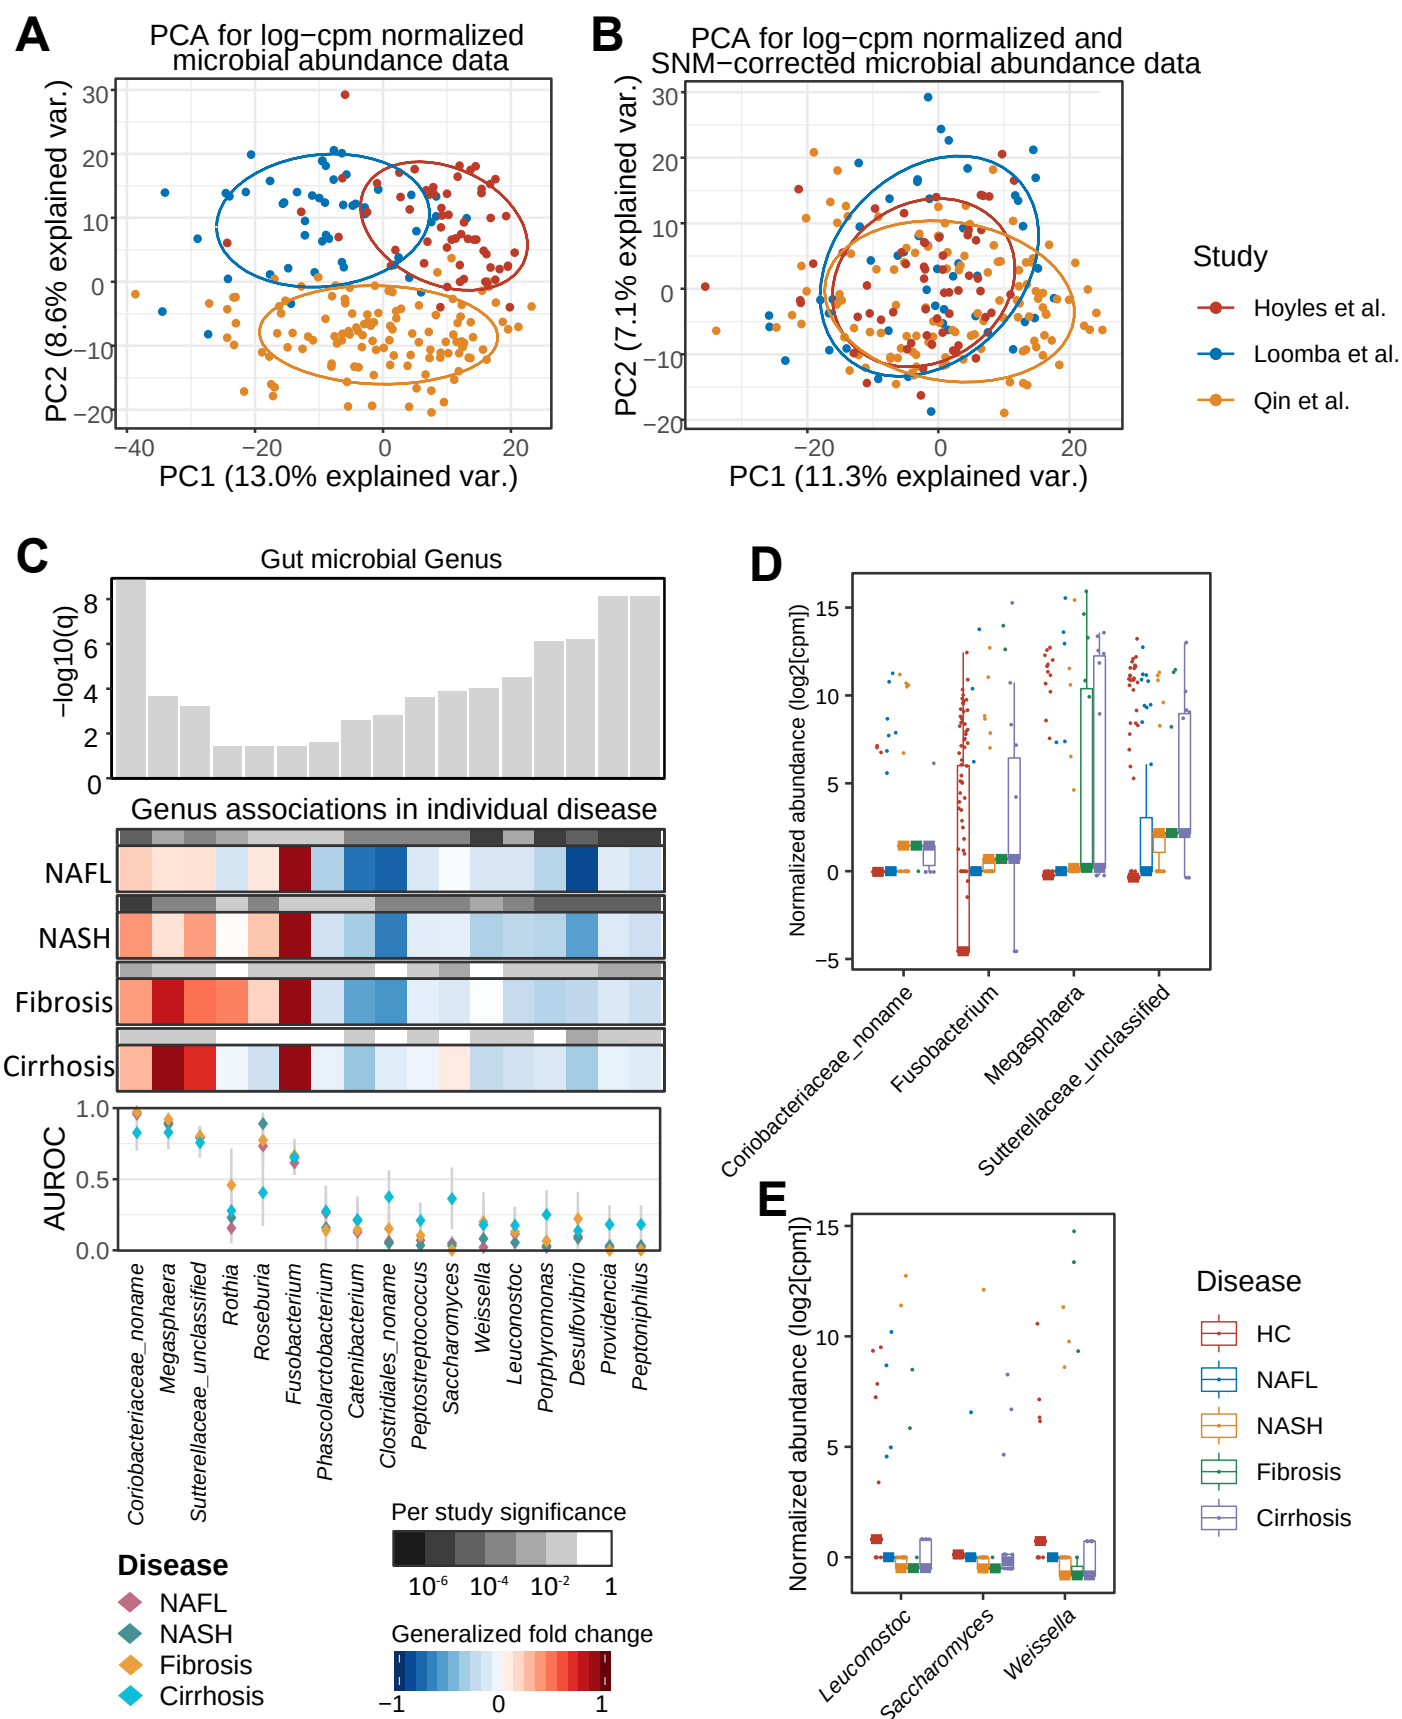

**Supplementary Figure 3: Normalization and association of microbiome taxonomic profiles with NAFLD at genera level.** (A) Principal components analysis (PCA) of log-cpm normalized data, with NAFLD microbiome samples colored by studies. (B) PCA of log-cpm -SNM data. (C) Meta-analysis significance of gut microbial genera derived from blocked Wilcoxon tests is given by the bar height (FDR = 0.05). Underneath, genera-level significance, as calculated with a blocked two-sided Wilcoxon test (FDR  $P$  value), and the generalized fold change within individual stages are displayed as heatmaps in gray and in color, respectively. Genera are ordered by meta-analysis significance and direction of change. Association strength is quantified by the AUROC across individual stages (color-coded diamonds), and the 95% confidence intervals are indicated by the gray lines. (D) Boxplots showing that genera was significantly correlated with NAFLD stages using partial Spearman's rank-based correlation (pSRC), adjusted for BMI (two-sided, FDR < 0.05;). (E) Boxplots showing that genera was significantly anti-correlated with NAFLD stages (pSRC, two-sided, FDR < 0.05). HC, healthy controls; NAFL, nonalcoholic fatty liver; NASH, nonalcoholic steatohepatitis.

**A** NAFL vs healthy controls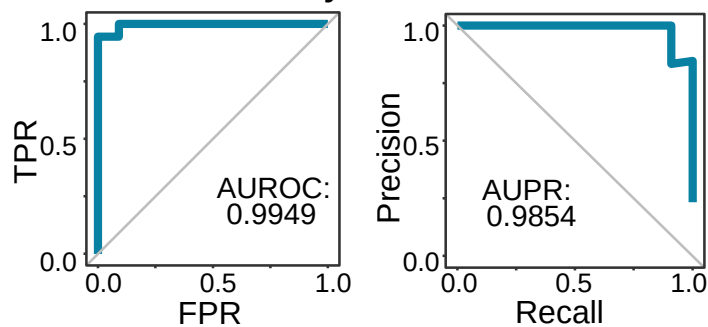**B** NASH vs healthy controls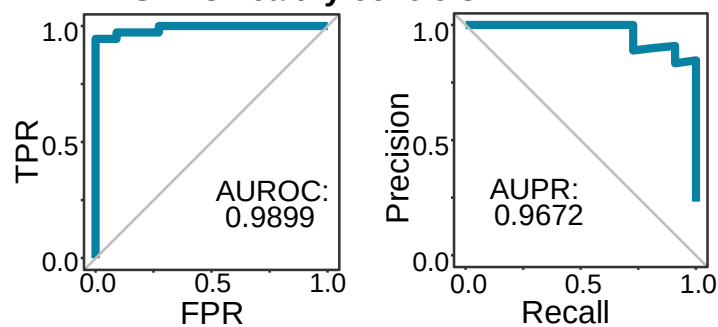**C** Fibrosis vs healthy controls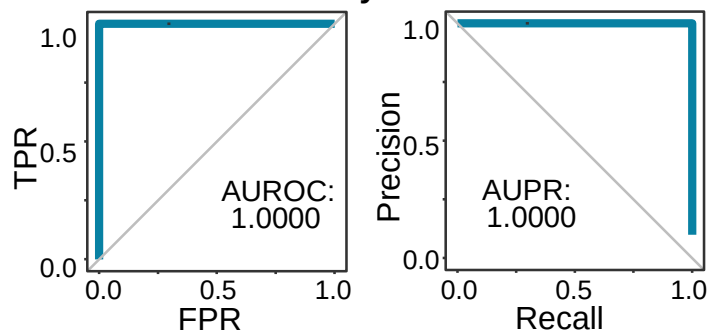**D** Cirrhosis vs healthy controls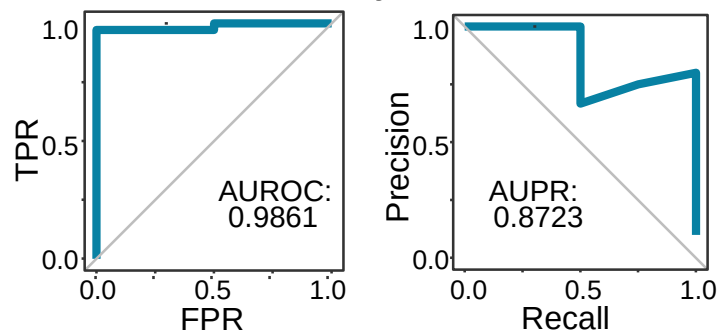**E** NAFL vs all other liver diseases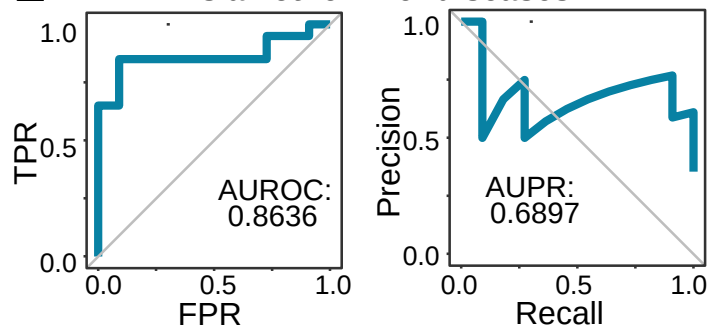**F** NASH vs all other liver diseases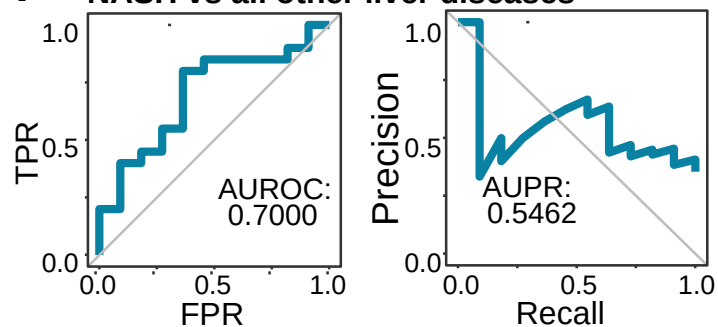**G** Fibrosis vs all other liver diseases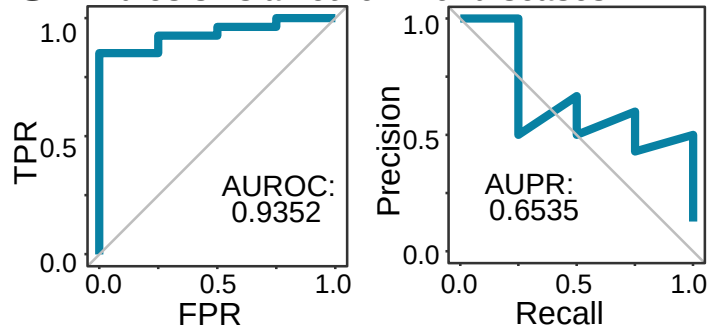**H** Cirrhosis vs all other liver diseases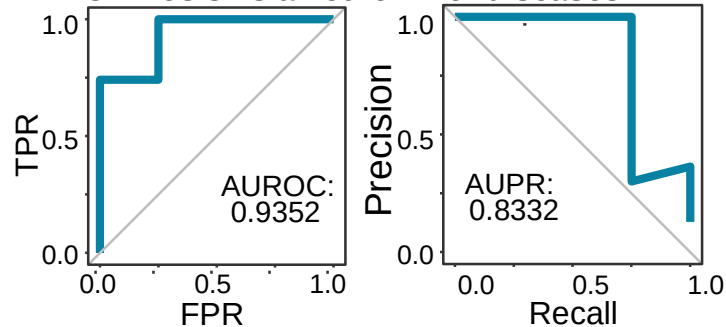

**Supplementary Figure 4: Performances of machine learning models to discriminate within and between NAFLD stages.** (A)-(D), Performances of models that distinguish a certain stage from healthy controls. (A) NAFL; (B) NASH; (C) fibrosis; (D) cirrhosis. (E)-(H), Performances of models that distinguish a certain stage from other stages. (E) NAFL; (F) NASH; (G) fibrosis; (H) cirrhosis. AUROC, area under the receiver operating characteristic curve; AUPR, area under the precision-recall curve; NAFL, nonalcoholic fatty liver; NASH, nonalcoholic steatohepatitis.

**A**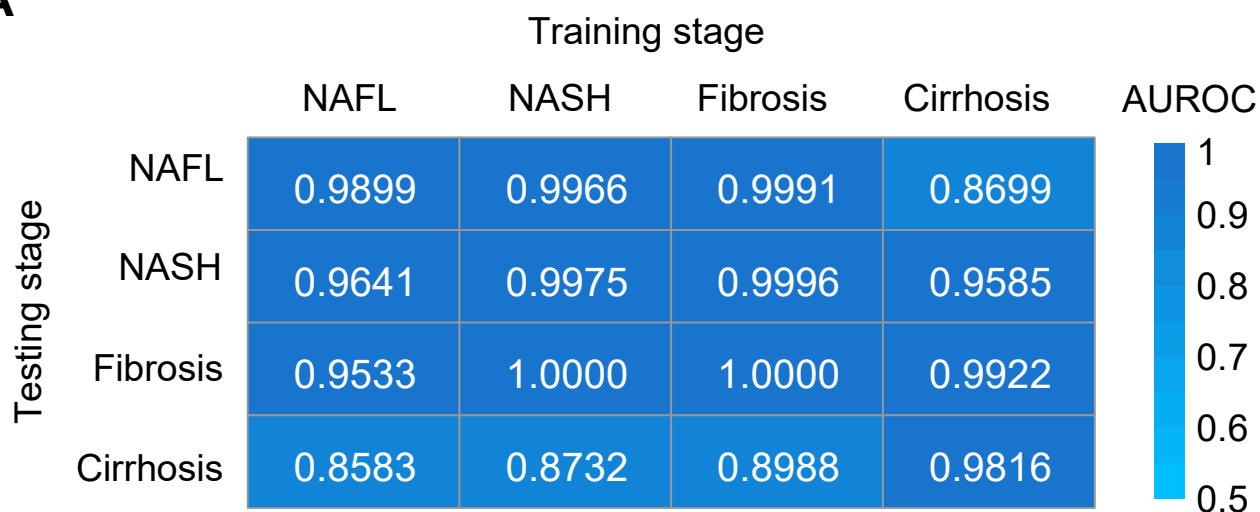**B**

|       | NAFL   | NASH   | Fibrosis | Cirrhosis |
|-------|--------|--------|----------|-----------|
| AUROC | 0.8818 | 0.7477 | 0.9352   | 0.9444    |
| AUPR  | 0.7597 | 0.7239 | 0.6535   | 0.8419    |

**Supplementary Figure 5. Taxonomic classification models generalize across stages by random forest.** (A) Classification accuracy resulting from validation within each stage (along the diagonal) and stage-to-stage model transfer (external validations off-diagonal) as measured by AUROC. (B) Classification accuracy resulting from the models designed to distinguish patients with one stage of NAFLD from other stages. AUROC, area under the receiver operating characteristic curve; AUPR, area under the precision-recall curve; NAFL, nonalcoholic fatty liver; NASH, nonalcoholic steatohepatitis.

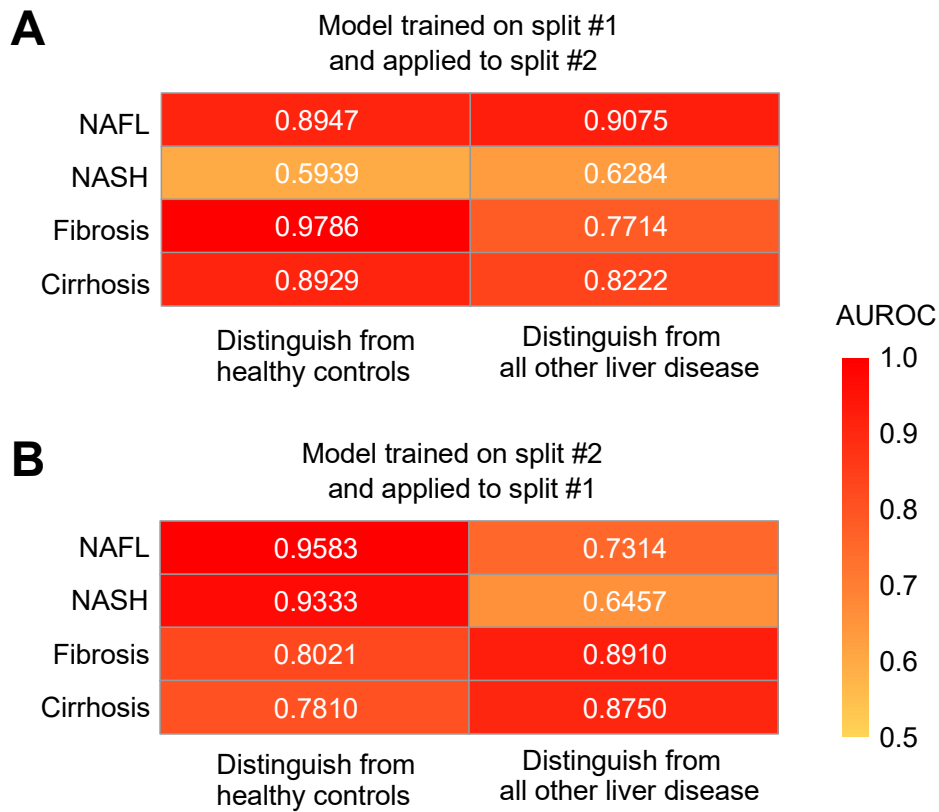

**Supplementary Figure 6: Internal validation of ML model pipeline.** Two independent halves of raw microbial count data were normalized and used for model training to predict one stage versus healthy controls (A) or all other stages (B); each model was then applied to the other half's normalized data. This heatmap compares the performances of these models compared to training and testing on 50–50% splits of the full data set.
